# Supplementary figures and images for: NGS Analysis of Clonality and Minimal Residual Disease in a Patient with Concurrent Richter’s Transformation and CLL/SLL
Source: Hindawi journal article supplement (doi:10.1155/2021/9740281), 2021-12-28

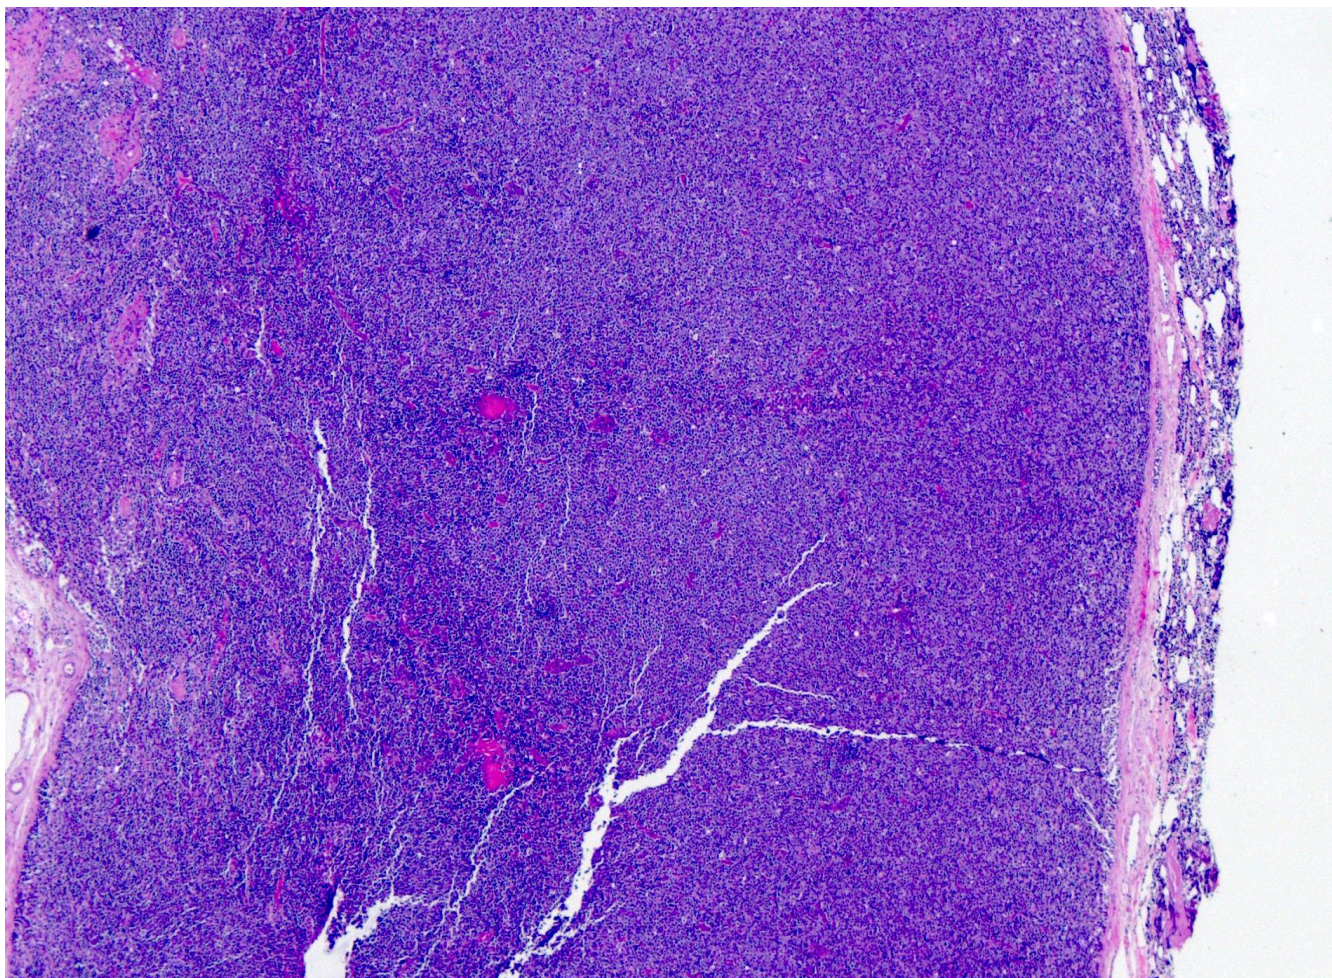



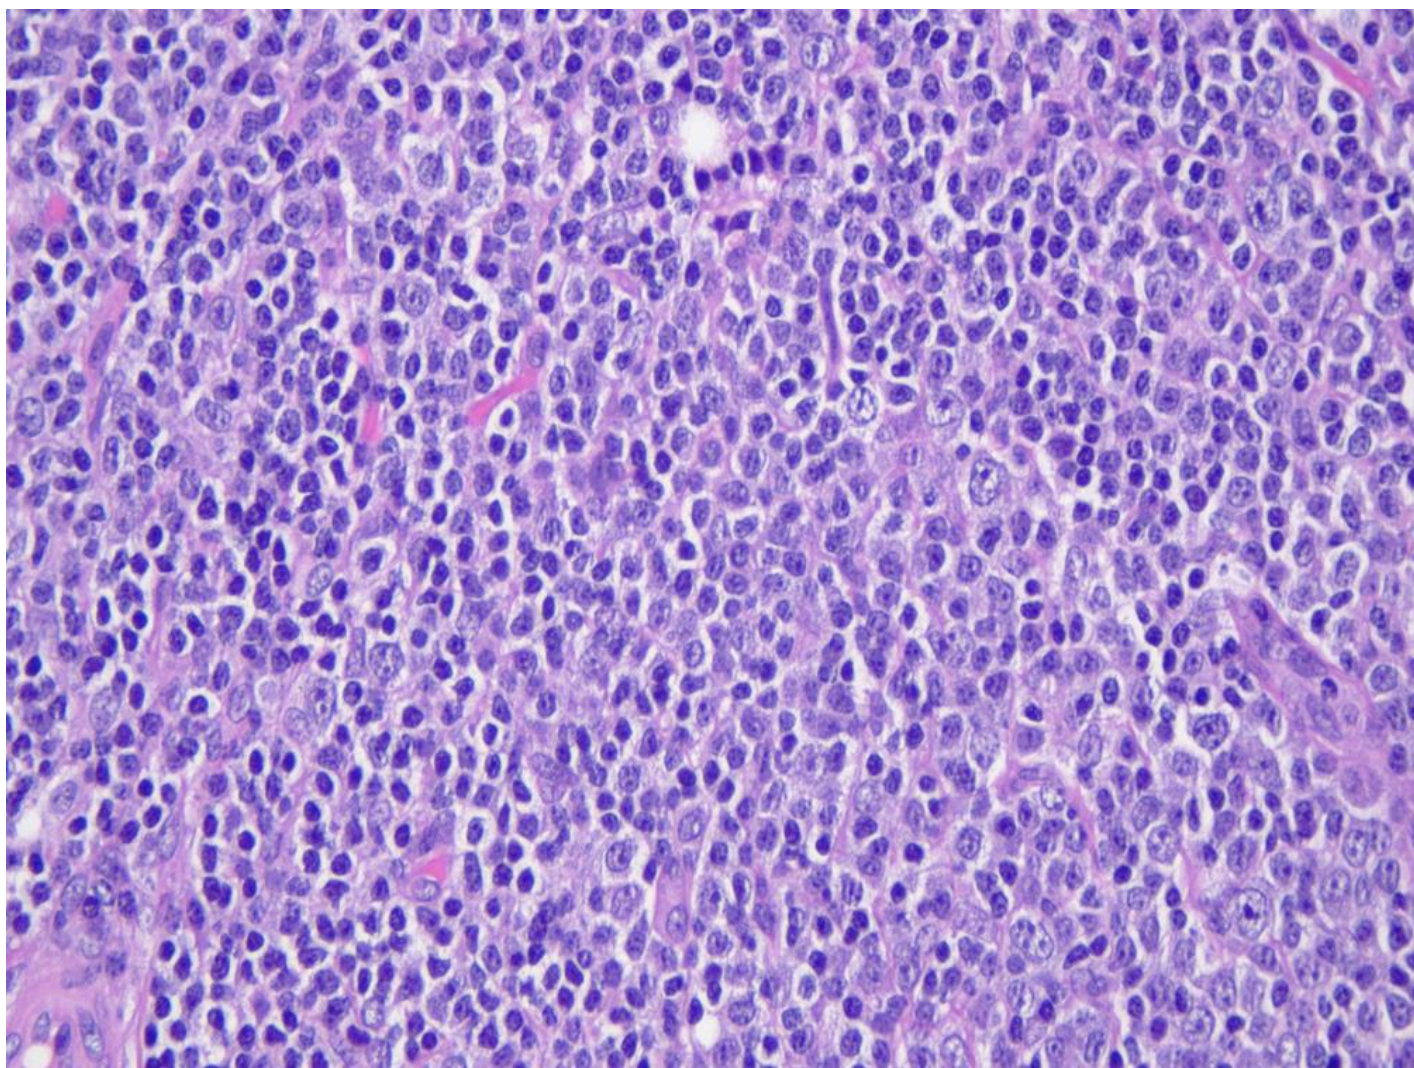

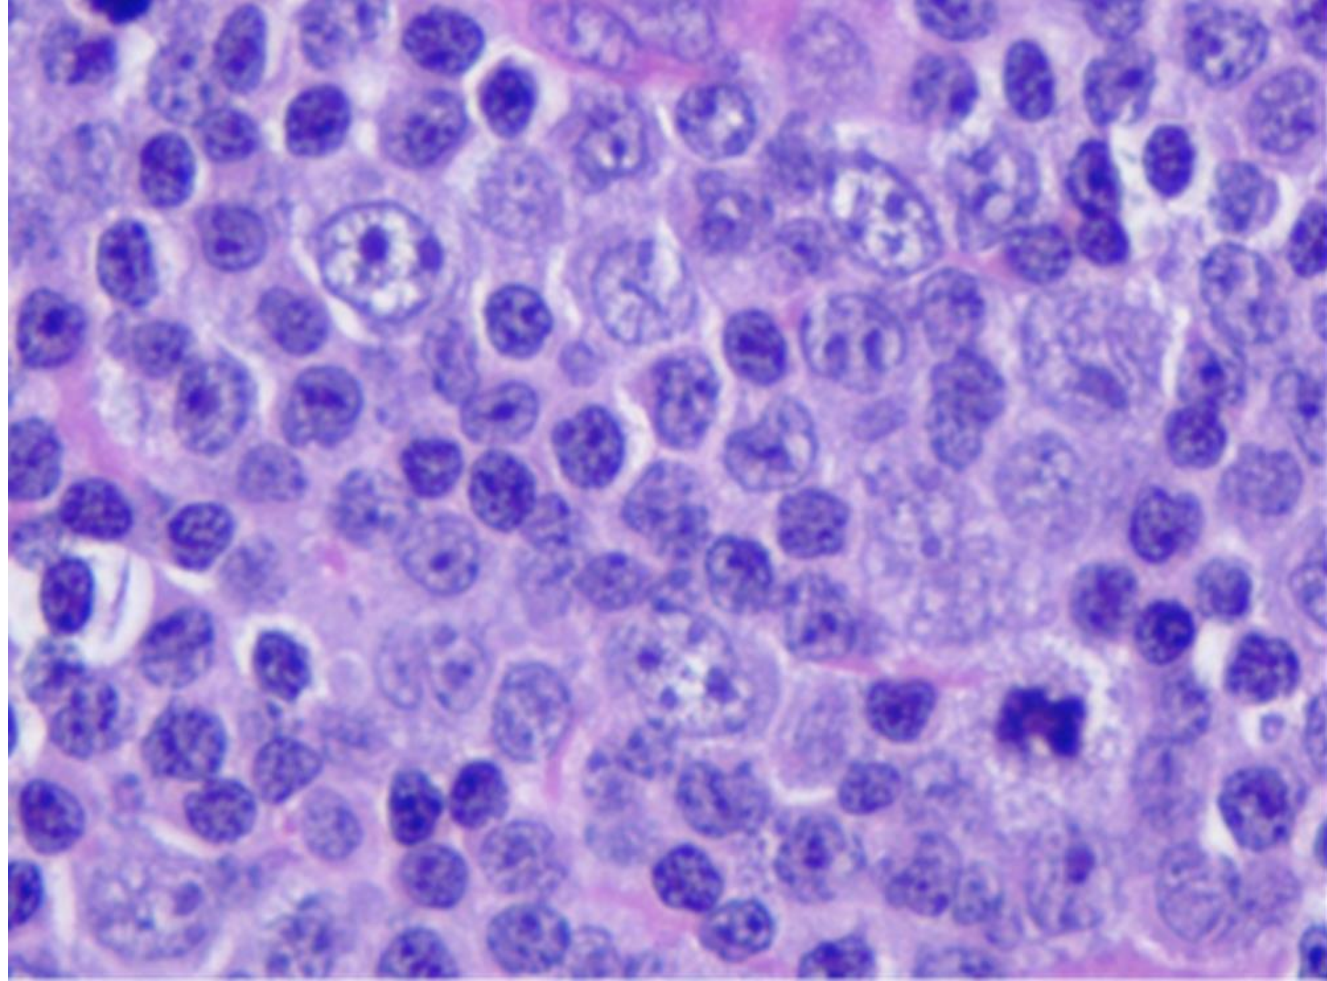

Supplement: f1 [file 9740281.f1.zip]
